# Supplementary material
Source: publisher figshare collection journal article supplement (https://rs.figshare.com/ndownloader/files/28178074)
Supplement: Supplementary file 1 [file 28178074]

## Sheet: Sheet1
Supplemental table 1. List of all specimens included in this study, with tube length/width measurements and counts of hemichordates and polychaetes preserved within them. Stratigraphic levels within Raymond Quarry are as described in Nanglu et al. 2020.
Specimen number	Stratigraphic level within Raymond Quarry	Length of tube (cm)	Width of tube (cm)	Number of hemichordates	Number of polychaetes
ROMIP 66145.1	9.1	7.367	1.827	4	5
ROMIP 66145.2	9.1	5.42	1.533	2	0
ROMIP 66145.3	9.1	3.506	1.798	1	6
ROMIP 66145.4	9.1	1.712	1.541	0	2
ROMIP 91-1231.1	9.1	8.596	1.64	2	6
ROMIP 91-1231.2	9.1	3.953	1.864	2	3
ROMIP 91-1231.3	9.1	6.888	1	1	2
ROMIP 65942	9.1	10.062	1.687	4	7
ROMIP 92-0132	9.1	8.549	1.912	0	0
ROMIP 66146	8.8	8.88	1.593	2	0
ROMIP 92-1065	8.4	NA	NA	1	0
ROMIP 66147	8	NA	NA	NA	NA
ROMIP 93-0248	9.2	5.495	1.597	2	0
ROMIP 93-0296	9	9.329	1.964	2	6
ROMIP 93-0345	8.4	10.153	1.997	2	1
ROMIP 93-0387	8.4	5.621	1.742	1	1
ROMIP 66149	9.3	18.336	1.991	0	0
ROMIP 93-0609	9.3	7.039	1.982	1	4
ROMIP 93-0917	9.3	7.293	1.745	1	0
ROMIP 93-1005.1	8.4	6.224	1.89	2	8
ROMIP 93-1005.2	8.4	4.917	NA	1	1
ROMIP 93-1007A	8.4	7.585	2.179	3	1
ROMIP 93-1007B	8.4	4.18	1.566	1	5
ROMIP 93-1008	8.4	4.151	0.821	0	1
ROMIP 66151.1	8.3	10.83	1.919	1	5
ROMIP 66151.2	8.3	3.394	1.995	1	1
ROMIP 93-1231	9.3	11.995	2.096	3	1
ROMIP 93-1438	9.3	11.788	1.987	4	3
ROMIP 93-1455	8.3	NA	NA	2	2
ROMIP 66153	8.5	NA	NA	1	NA
ROMIP 66154	8.4	8.768	1.605	2	2
ROMIP 66156	8.4	10.73	1.753	1	5
ROMIP 66155	8.4	15.864	1.835	NA	0
ROMIP 64559.1	9.1	7.904	2.172	2	4
ROMIP 64559.2	9.1	1.794	2.506	1	1
